# Supplementary material
Source: Springer Nature journal article supplement (https://www.springermedizin.de/resource/supplementary/12889_2013_5499_MOESM1_ESM.pdf/9495524)
Supplement: MOESM1 [file 9495524]

Total number of organizations signed in n=12  
(=5080 employees)

Questionnaire not distributed by 1 organization: n=200  
Non-response (after 1 reminder e-mail): n=3764  
Result: n=1116 employees

**ADOPTION**

Organizations that did not adopt the program: n=5

Organizations that adopted the program: n=7

Employees not eligible: n=467  
(42%)

**REACH**

Employees eligible: n=649 (58%)

Employees aware of the program: n=422 (65% of eligible employees)  
→ 110 registered (26%)  
→ 312 not registered (74%)

Employees not aware of the program: n=227 (35% of eligible employees)

**IMPLEMENTATION**  
Extend to which adopting organizations implemented all program components: n=7

**EFFECTIVENESS**  
Difference in general attitude towards cycling between employees aware ( $3.8 \pm 0.52$ ) and unaware ( $3.6 \pm 0.56$ ) of the program ( $F= 19.8, p<0.001$ )  
  
Difference in frequency of commuter cycling per week between employees aware ( $1.27 \pm 2.01$ ) and unaware ( $0.63 \pm 1.56$ ) of the program ( $F= 20.57, p<0.001$ )

**MAINTENANCE (org)**  
Companies with intention for continuation: n=5  
Undecided: n=2

**MAINTENANCE (ind)**  
Intention to commuter cycling (employees aware and registered):  
Continue to commuter cycling: 34%  
Stop commuter cycling: 1%  
Undecided=3%  
Program didn't change behavior: 62%
